# Supplementary material for: Catalytic Hydrodechlorination of 4-Chlorophenol by Palladium-Based Catalyst Supported on Alumina and Graphene Materials
Source: MDPI journal article supplement (doi:10.3390/nano13091564), 2023-05-06
Supplement: s1 [file s1]

## Supplementary Material

### Catalytic hydrodechlorination of 4-chlorophenol by palladium-based catalyst supported on alumina and graphene materials

Jintae Jeon, Yuri Park\*, Yuhoon Hwang\*

Department of Environmental Engineering, Seoul National University of Science and  
Technology, Seoul 01811, Republic of Korea

---

\*Corresponding author

**Dr. Yuri Park**

E-mail: [yuripark@seoultech.ac.kr](mailto:yuripark@seoultech.ac.kr); Tel: +82-2-970-6626; Fax: +82-2-971-5776

**Dr. Yuhoon Hwang**

E-mail: [yhhwang@seoultech.ac.kr](mailto:yhhwang@seoultech.ac.kr); Tel: +82-2-970-6626; Fax: +82-2-971-5776

### **Text S1. List of chemical reagents**

Palladium chloride ( $\text{PdCl}_2$ , Samchun Pure Chemical Co., Ltd., Korea) was used as a precursor for Pd based catalysts. As supporting materials for Pd catalyst, aluminum oxide ( $\gamma\text{-Al}_2\text{O}_3$ , Kanto Chemical Co., INC., Japan), GO, and rGO were used. For GO preparation, graphite powder ( $<20\text{ }\mu\text{m}$ ; Sigma-Aldrich, USA), potassium permanganate (99.3%; Duksan Pure Chemicals Inc., Korea), sulfuric acid (98%; Daejung Chemicals & Metals Co., Ltd., Korea), phosphoric acid (85%, Samchun Pure Chemical Co., Ltd., Korea), hydrogen peroxide (34.5%; Samchun Pure Chemical Co., Ltd., Korea), and ethyl alcohol (94.5%; Daejung Chemicals & Metals Co., Ltd., Korea) were used. For the preparation of rGO, sodium borohydride (98%; Samchun Pure Chemical Co., Ltd., Korea) and ethylene glycol anhydrous (99.8%; Sigma Aldrich, USA) were used. For granulation of Pd/rGO, sand (50 – 70 mesh) and sea sand (10 – 20 mesh) were purchased from Sigma Aldrich (USA) and Daejung Chemicals & Metals Co., Ltd. (Korea), respectively and used as supplied.

4-chlorophenol (99%; Samchun Pure Chemical Co., Ltd., Korea), phenol (99%; Daejung Chemicals & Metals Co., Ltd., Korea) were used for HDC reaction. The pH control was done by 0.1M sodium bicarbonate (99.5%; Sigma Aldrich (USA)) and 0.1M sodium carbonate (99.7%; Sigma Aldrich (USA)). Methanol (HPLC grade; Samchun Pure Chemical Co., Ltd., Korea) and acetic acid (HPLC grade; Samchun Pure Chemical Co., Ltd., Korea) were used for HPLC analysis. DI water was generated using a Milli-Q system (Synergy®, Merck Millipore, USA).

## **Text S2. Synthesis of GO and rGO by Hummer's method**

GO was produced using the modified Hummer's method. A mixture of 3 g of graphite and 18 g of Potassium permanganate was slowly added to 400 mL of a solution made of  $\text{H}_2\text{SO}_4$  (360 mL)/ $\text{H}_3\text{PO}_4$  (40 mL) and stirred at 50 °C for 12 h. Then, the solution prepared in 400 mL of pre-frozen DI water was slowly poured. After pouring the solution, 3 mL of  $\text{H}_2\text{O}_2$  (34.5%) was injected, mixed lightly, and stored to overnight. At this time, it was confirmed that a yellow layer was formed, and GO was successfully produced. Thereafter, washing was performed three times in DI water, HCl (10%) and ethanol and using a centrifuge set to 4000 rpm and 20 min. After washing, it was dried in a vacuum oven set at 60 °C for 12 h to prepare GO [55].

The production of rGO was carried out in a simple method using sodium borohydride as a reducing agent. 0.5 g of the produced GO was put in 250 mL DI water, sonicated for 2 h, and dispersed. Thereafter, 0.95 g of  $\text{NaBH}_4$  was added to the water at 80 °C and stirred at 150 rpm to overnight. At this time, the concentration of  $\text{NaBH}_4$  was added 0.3 M to induce a reduction reaction. After stirring for 12 h, the mixture was stirred in a centrifuge set to 4000 rpm for 20 min, washed using DI water, and dried in a vacuum oven set to 60 °C for 12 h to prepare rGO [56].

### **Text S3. HPLC Method for detection of 4-CP**

The concentration of 4-CP was measured by UHPLC. The system, with Thermo LPG-3400SD gradient pump was used for all 4-CP samples taken after the HDC reaction. A Thermo Column C18 Accucore AQ (150×4.5 mm, 2.6  $\mu$ m) was used and maintained at 50 °C throughout the run. The mobile phase of 0.1% acetic acid in DI water and 0.1% acetic acid in methanol (1:1 v/v) at the flow rate of 0.5 mL/min with total 15 mins run time was used and the UV detector wavelength set at 270 nm was used for the detection of 4-CP and phenol peaks.

**Table S1.** Carbon and palladium composition in Pd/rGOSC using Elemental analysis and ICP-OES analysis

| Elements   | Fresh Pd/rGOSC | Used Pd/rGOSC |
|------------|----------------|---------------|
| Carbon (%) | 0.14           | 0.10          |
| Pd (ppm)   | 222.76         | 88.66         |

**Table S2.** Percentage of 4-CP removal, and pseudo first-order rate constant for HDC reaction of 4-Chlorophenol for each parameter

| Parameter        | Catalyst<br>dosage(g/L) | 4-CP C <sub>i</sub><br>(mg/L) | Pd-loading<br>(w.t%) | Removal<br>rate (%) | K<br>(min <sup>-1</sup> ) | R <sup>2</sup> |
|------------------|-------------------------|-------------------------------|----------------------|---------------------|---------------------------|----------------|
| Support material |                         |                               |                      |                     |                           |                |
| Alumina          | 1                       | 100                           | 5                    | 98.85               | 0.1352                    | 0.9941         |
| GO               | 1                       | 100                           | 5                    | 100                 | 3.075                     | 0.9974         |

|                               |     |     |   |       |        |        |
|-------------------------------|-----|-----|---|-------|--------|--------|
| rGO                           | 1   | 100 | 5 | 100   | 2.334  | 0.9975 |
| Pd-loading                    |     |     |   |       |        |        |
| Pd 1%                         | 1   | 100 | 1 | 96.94 | 0.0757 | 0.9899 |
| Pd 3%                         | 1   | 100 | 3 | 98.99 | 0.1243 | 0.9962 |
| Pd 5%                         | 1   | 100 | 5 | 98.85 | 0.1352 | 0.9941 |
| Initial concentration of 4-CP |     |     |   |       |        |        |
| 25                            | 1   | 25  | 5 | 98.85 | 0.2360 | 0.9876 |
| 50                            | 1   | 50  | 5 | 98.51 | 0.2136 | 0.9926 |
| 100                           | 1   | 100 | 5 | 98.85 | 0.1352 | 0.9941 |
| Catalyst dosage               |     |     |   |       |        |        |
| 0.2                           | 0.2 | 50  | 5 | 88.17 | 0.0419 | 0.9984 |
| 0.5                           | 0.5 | 50  | 5 | 95.21 | 0.0656 | 0.9989 |
| 1                             | 1   | 50  | 5 | 98.51 | 0.2136 | 0.9926 |
| pH control                    |     |     |   |       |        |        |
| 4                             | 1   | 50  | 5 | 98.63 | 0.1946 | 0.9921 |
| 6.5                           | 1   | 50  | 5 | 98.42 | 0.1240 | 0.9904 |
| 10                            | 1   | 50  | 5 | 97.23 | 0.1015 | 0.9916 |

**Table S3.** Raw and used Pd composition (%) in the catalyst using the XPS analysis

| Pd(%)          | Pd/Al | Pd/rGO | Pd/rGOSC |
|----------------|-------|--------|----------|
| Fresh catalyst | 2.11% | 0.86%  | -        |

|               |       |   |   |
|---------------|-------|---|---|
| Used catalyst | 1.69% | - | - |
|---------------|-------|---|---|

Note- The Pd composition in the used Pd/rGO, and fresh & spent Pd/rGOSC were detected less than the detection limit of XPS analyzer that we used.



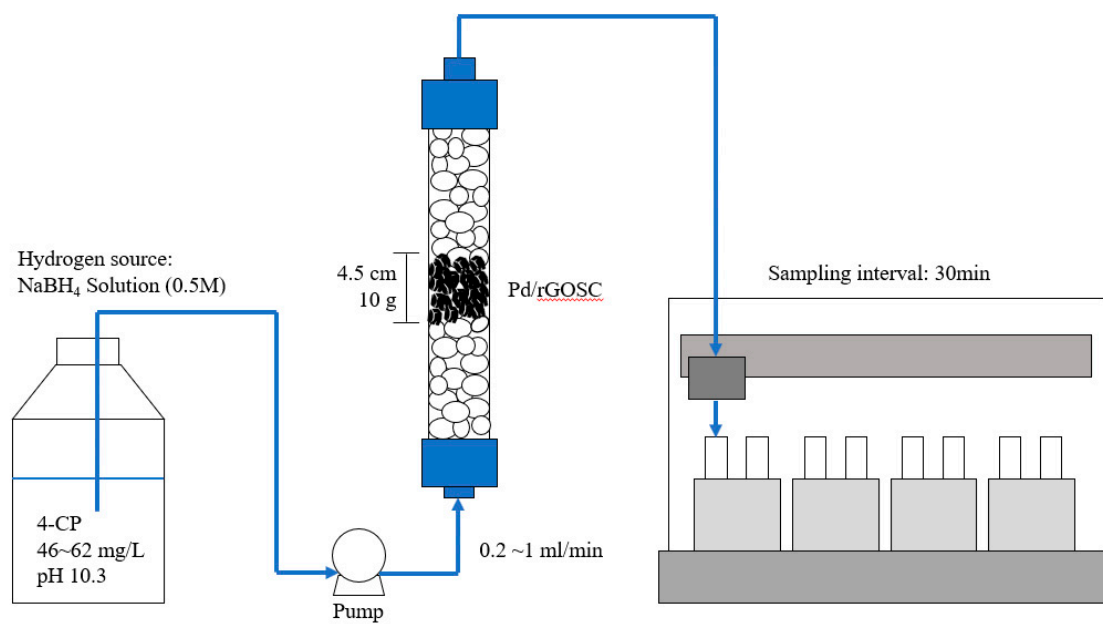

**Figure S1.** A schematic diagram of a column test with continuous HDC process

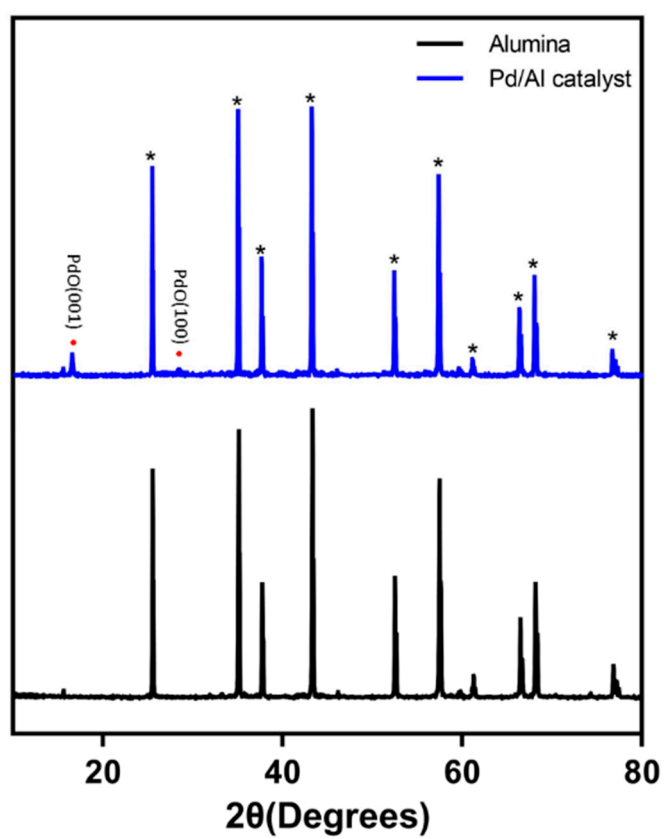

(\*) Alumina x-ray diffraction peak

**Figure S2.** XRD patterns of alumina and Pd/Alumina catalyst (Pd [5 wt.%])

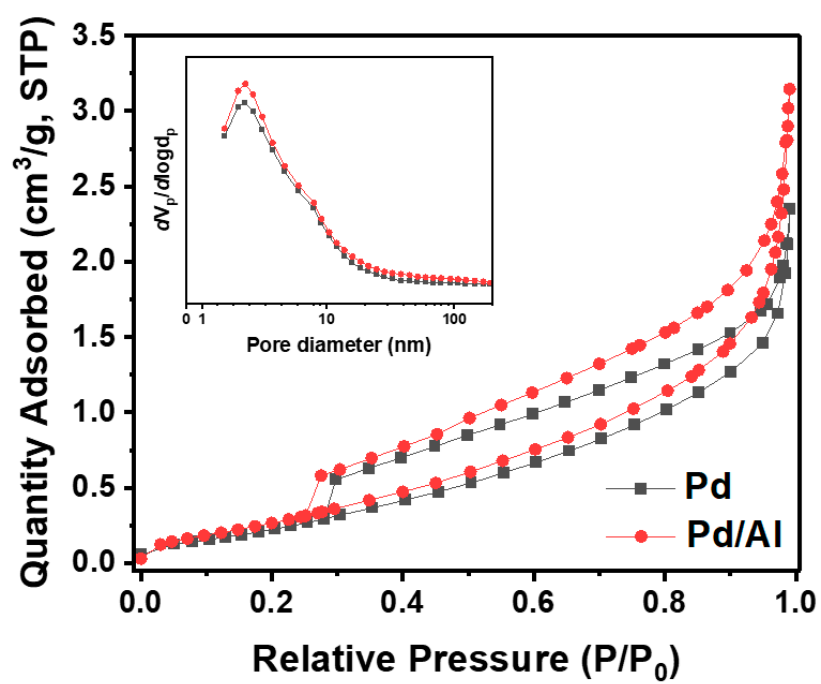

**Figure S3.**  $N_2$  adsorption-desorption isotherms and BJH pore size distribution for alumina and Pd/Al catalyst (Pd [5 wt.%])

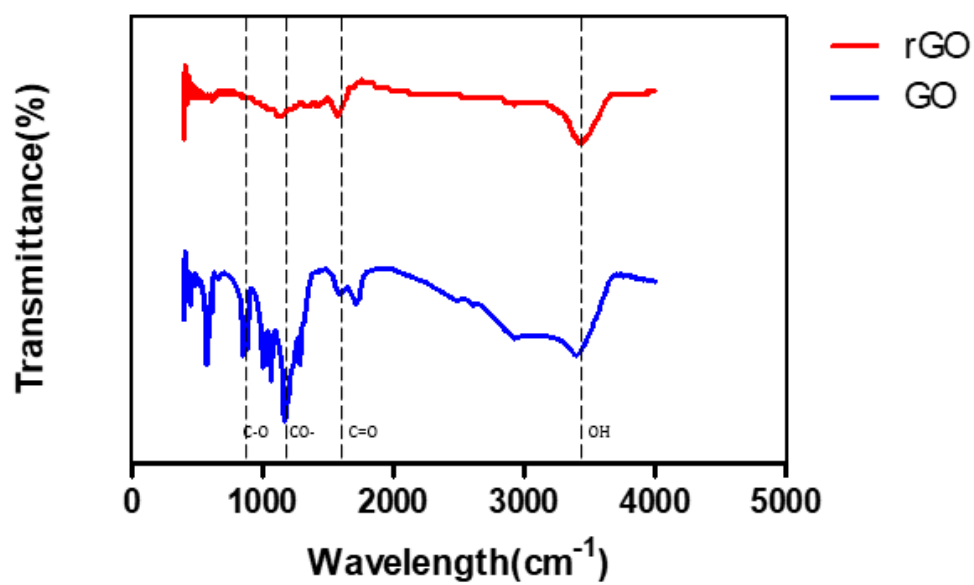

**Figure S4.** FT-IR spectra of reduced graphene oxide (rGO) and graphene oxide (GO)

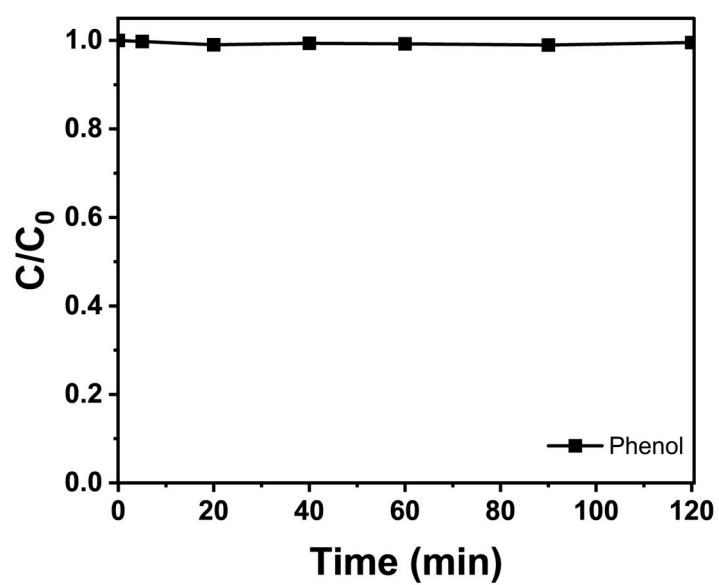

**Figure S5.** Concentration profile of 4-CP without Palladium catalyst  
(Alumina dosage: 1 g/L, initial Concentration of 4-CP: 50 mg/L)

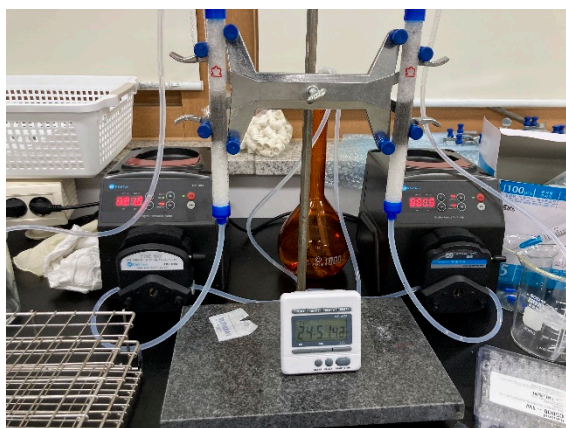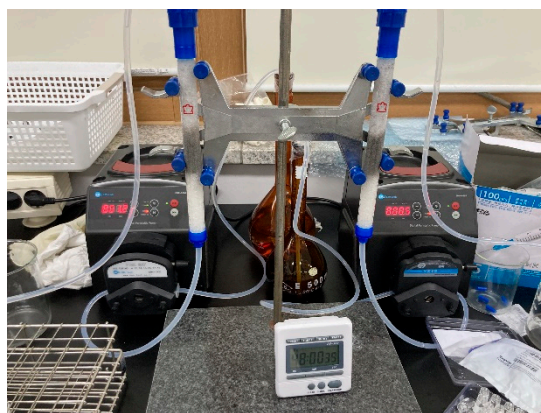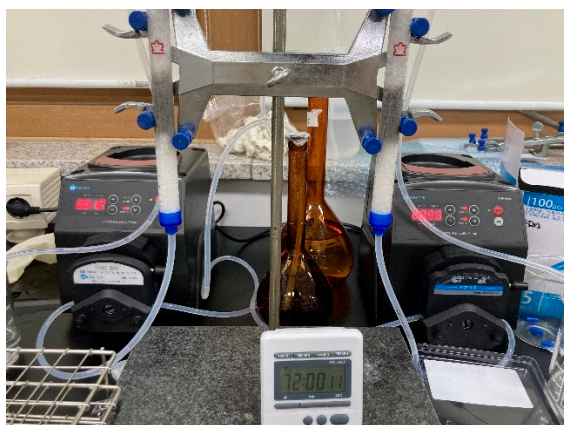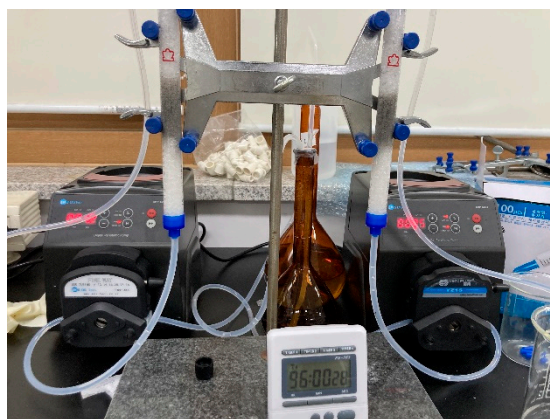

**Figure S6.** Column test configuration (flow rate: left: 1 mL/min, right: 0.5 mL/min)

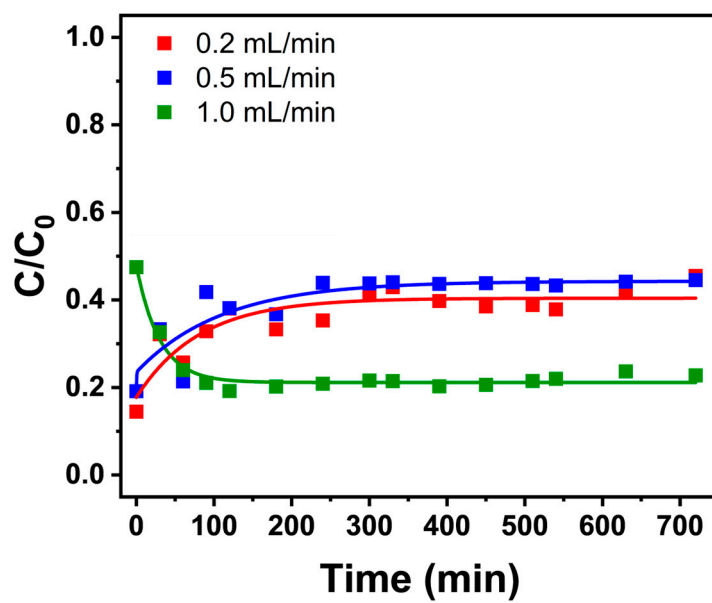

**Figure S7.** Continuous reaction test result – phenol production.  
 (4-CP initial concentration: 46~62 mg/L, catalyst dosage: 10g, □: Phenol)

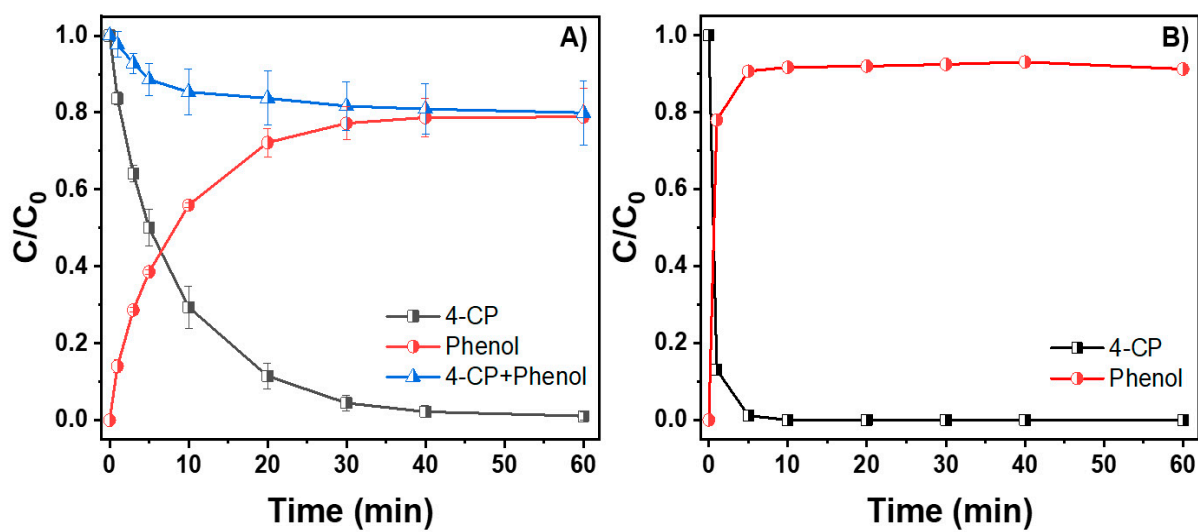

**Figure S8.** Mass balance of phenol and 4-chlorophenol using (A) Pd/Al catalyst and (B) Pd/rGO catalyst



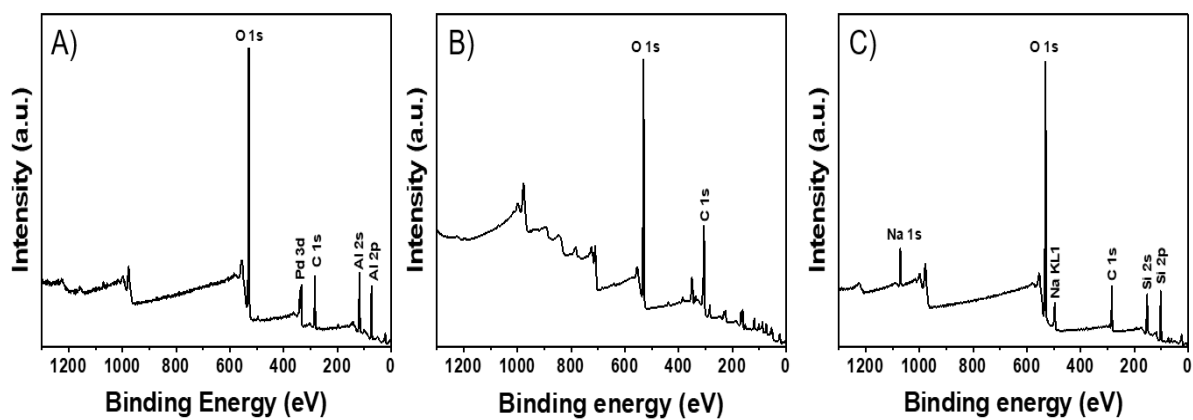

**Figure S9.** XPS survey scan spectra for spent (A) Pd/Al (5%), (B) Pd/rGO (Pd [5 wt.%]), and (C) Pd/rGOSC after five cycles of the HDC reaction

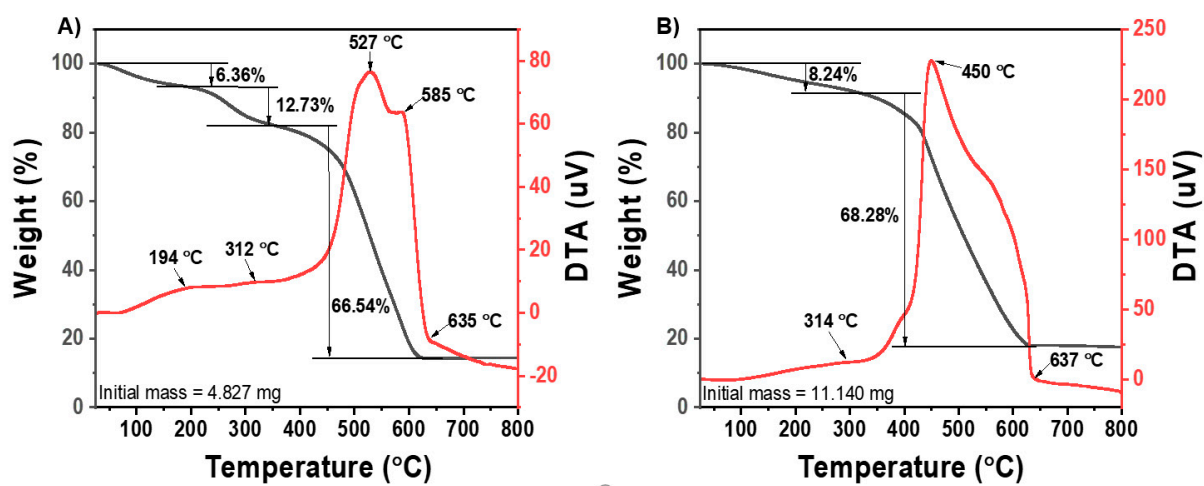

**Figure S10.** TGA and DTA profiles of (A) fresh Pd/rGO (Pd [5 wt.%]) and (B) used Pd/rGO (after five cycles of the HDC reaction) catalysts
